# Supplementary material
Source: PubMed Central journal article supplement (PMC3385790)
Supplement: supp_me.2012-1027_me-12-1027_2F_1t_.pdf [file supp_me.2012-1027_me-12-1027_2F_1t_.pdf]

1 **SUPPLEMENTAL DATA**

2 Supplemental Fig. 1 The purity of different cell types was confirmed using specific markers. GDF9 for  
3 oocyte, FSH receptor for granulosa cells, and CYP17a1 for theca cells. N. D.: not detectable, OC: oocyte;  
4 Somatic: somatic cells; GC: granulosa cells; TC: theca cells.

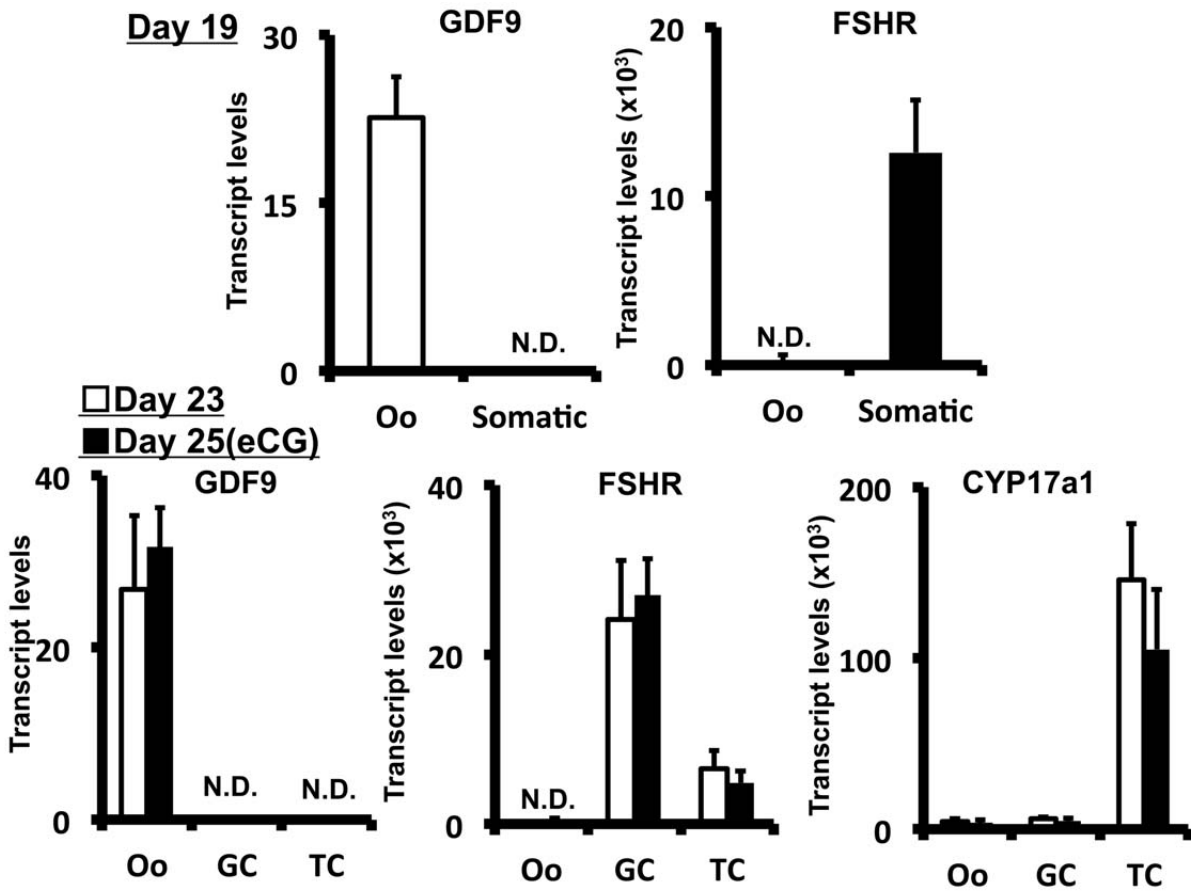

5

6

7 **Supplemental Fig. 2** Morphology of cultured preantral follicles treated with different hormones for 4  
8 days. Representative photographs of follicles at day 0 of culture or at 4 days after culture are shown.  
9 Control group received no treatment whereas other groups were treated with different doses (3-300 nM)  
10 of CNP, 100nM of ANP, 5mM of 8-bromo-cGMP (cGMP), FSH (25 ng/ml), or FSH plus 100nM of CNP.

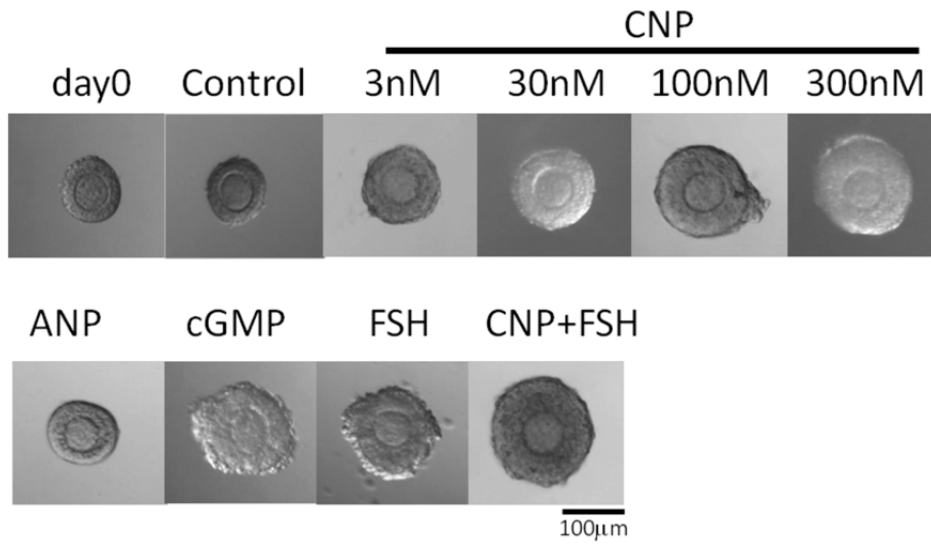

11

12

13

14

15

16

17

**Supplementary Table 1: Primers used for RT-PCR**

| Genes                 | Sequences of primer set (5'-3') |                                                           |
|-----------------------|---------------------------------|-----------------------------------------------------------|
|                       | F; forward                      | R; reverse                                                |
| GDF9                  | F<br>R                          | CCAGAGGACGGAGTGTTTAGC<br>TGAAGAGACTGCCAAGAGTGG            |
| FSHR                  | F<br>R                          | TCTAACAGGGTCTTCCTCTGC<br>CTCAGTTCAATGGCGTTCC              |
| CYP17a1               | F<br>R                          | TTCTGATCGACCCTTTCAAAGTG<br>GGATCCGGACGTTAGATTCC           |
| NPPC                  | F<br>R                          | GGTCTGGGATGTTAGTGCAGCTA<br>TAAAAGCCACATTGCGTTGGA          |
| NPRB                  | F<br>R                          | GCTGACCCGGCAAGTTCTGT<br>ACAATACTCGGTGACAATGCAGAT          |
| $\beta$ -actin        | F<br>R                          | GTATCCATGAAATAAGTGGTTACAGG<br>GCAGTACATAATTTACACAGAAGCAAT |
| LH receptor           | F<br>R                          | GTATCCATGAAATAAGTGGTTACAGG<br>GCAGTACATAATTTACACAGAAGCAAT |
| CYP11a                | F<br>R                          | CCAGAGGACGGAGTGTTTAGC<br>TGAAGAGACTGCCAAGAGTGG            |
| CYP19a1               | F<br>R                          | TCTAACAGGGTCTTCCTCTGC<br>CTCAGTTCAATGGCGTTCC              |
| StAR                  | F<br>R                          | TTCTGATCGACCCTTTCAAAGTG<br>GGATCCGGACGTTAGATTCC           |
| Inhibin-a             | F<br>R                          | GGTCTGGGATGTTAGTGCAGCTA<br>TAAAAGCCACATTGCGTTGGA          |
| Progesterone receptor | F<br>R                          | GCTGACCCGGCAAGTTCTGT<br>ACAATACTCGGTGACAATGCAGAT          |
| CREB                  | F<br>R                          | CCAAACTAGCAGTGGGCAGT<br>CCCATCCGTACCATTGTT                |
| IGF1                  | F<br>R                          | CAAAAGCAGCCCGCTCTA<br>TCGATAGGGACGGGGACT                  |
| GATA6                 | F<br>R                          | GGTCTCTACAGCAAGATGAATGG<br>TGGCACAGGACAGTCCAAG            |
| TPA                   | F<br>R                          | GCCTGGGCAGACACAATTA<br>ATCACATGGCACCAAGGTC                |
| WT1                   | F<br>R                          | CAGATGAACCTAGGAGCTACCTAAA<br>TGCCCTTCTGTCCATTCA           |
| CEBPa                 | F<br>R                          | AAACAACGCAACGTGGAGA<br>GCGGTCATTGTCACTGGTC                |
